# Supplementary material for: Release factor-dependent ribosome rescue by BrfA in the Gram-positive bacterium Bacillus subtilis
Source: PubMed Central journal article supplement (PMC6881298; doi:10.1038/s41467-019-13408-7), 2019-11-27
Supplement: 41467_2019_13408_MOESM1_ESM.pdf [file 41467_2019_13408_MOESM1_ESM.pdf]

**Supplementary Information**

**Release factor-dependent ribosome rescue by BrfA in the  
Gram-positive bacterium *Bacillus subtilis***

**Shimokawa-Chiba et al.**

## Supplementary Tables

**Supplementary Table 1. Data collection, refinement and validation statistics**

| <b>BrfA-RF2-ns70S</b>                           |             |                                    |
|-------------------------------------------------|-------------|------------------------------------|
| <b>Data collection</b>                          |             |                                    |
| Particles                                       | 154,405     |                                    |
| Microscope                                      | Titan Krios |                                    |
| Detector                                        | Falcon III  |                                    |
| Pixel size (Å)                                  | 1.065       |                                    |
| Defocus range (μm)                              | 0.4-2.2     |                                    |
| Voltage (keV)                                   | 300         |                                    |
| Electron dose (e <sup>-</sup> /Å <sup>2</sup> ) |             | 2.0                                |
| <b>Model composition</b>                        |             |                                    |
| Protein residues                                | 6100        |                                    |
| RNA nucleotides                                 | 4646        |                                    |
| Hydrogens                                       | 0           |                                    |
| <b>Refinement</b>                               |             |                                    |
| Resolution (Å)                                  |             | 3.06                               |
| Map sharpening B factor (Å <sup>2</sup> )       | -73.0479    |                                    |
| CC map/model                                    | 0.85        |                                    |
| <b>Validation: proteins</b>                     |             |                                    |
| Poor rotamers (%)                               | 0.54        |                                    |
| Ramachandran outliers (%)                       |             | 0.22                               |
| Bad backbone bonds (%)                          | 0.01        |                                    |
| Bad backbone angels (%)                         | 0.05        |                                    |
| <b>Validation: RNA</b>                          |             |                                    |
| Correct sugar puckers (%)                       |             | 99.31                              |
| Good backbone conformations (%)                 | 79.88       |                                    |
| Bad bonds (%)                                   | 0.00        |                                    |
| Bad angels (%)                                  | 0.02        |                                    |
| <b>Scores</b>                                   |             |                                    |
| MolProbity                                      |             | 1.74 (88 <sup>th</sup> percentile) |
| Clash score, all atoms                          |             | 4.98 (93 <sup>nd</sup> percentile) |

## Supplementary Table 2. *E. coli* strains

| Name      | Description                                                                                                                                                                            | Reference  |
|-----------|----------------------------------------------------------------------------------------------------------------------------------------------------------------------------------------|------------|
| BL21(DE3) | F <sup>-</sup> , <i>ompT</i> , <i>hsdS</i> ( <i>r</i> , <i>m</i> ), <i>gal</i> ( $\lambda$ cl 857, <i>ind1</i> , <i>Sam7</i> , <i>nin5</i> , <i>lacUV5-T7gene1</i> ), <i>dcm</i> (DE3) | Promega    |
| NAE970    | BL21(DE3)/pNAR913 ( <i>Bs_prfA-his</i> .)                                                                                                                                              | This study |
| NAE972    | BL21(DE3)/pNAR915 ( <i>Bs_prfB-his</i> .)                                                                                                                                              | This study |
| NAE973    | BL21(DE3)/pNAR916 ( <i>brfA62-his</i> .)                                                                                                                                               | This study |
| NAE982    | BL21(DE3)/pNAR917 ( <i>his-arfA</i> (2-60))                                                                                                                                            | This study |
| NAE1003   | BL21(DE3)/pCH2307 ( <i>Bs_prfB</i> (GAQ)- <i>his</i> .)                                                                                                                                | This study |
| NAE1017   | BL21(DE3)/pNAR939 ( <i>Bs_pfrB</i> (SPT)- <i>his</i> .)                                                                                                                                | This study |

## Supplementary Table 3. *B. subtilis* strains and construction

| Name     | Description                                                                                                                         | Reference         | Construction |          |
|----------|-------------------------------------------------------------------------------------------------------------------------------------|-------------------|--------------|----------|
|          |                                                                                                                                     |                   | Host         | DNA      |
| PY79     | <i>WT</i>                                                                                                                           | ref. <sup>1</sup> |              |          |
| BKE23540 | $\Delta$ <i>brfA::erm</i>                                                                                                           | ref. <sup>2</sup> |              |          |
| BKE33600 | $\Delta$ <i>smpB::erm</i>                                                                                                           | ref. <sup>2</sup> |              |          |
| D1       | $\Delta$ <i>ssrA::cat</i>                                                                                                           | ref. <sup>3</sup> |              |          |
| TSB2     | $\Delta$ <i>ssrA::cat::tet</i>                                                                                                      | This study        | SCB2582      | pCm::Tc  |
| NAB1196  | <i>thrC::P<sub>xylA</sub> GFP<math>\Omega</math>erm</i>                                                                             | This study        | PY79         | pNAR778  |
| NAB1198  | <i>thrC::P<sub>xylA</sub> GFP-ns<math>\Omega</math>erm</i>                                                                          | This study        | PY79         | pNAR780  |
| NAB1200  | $\Delta$ <i>ssrA::cat</i> , <i>thrC::P<sub>xylA</sub> GFP<math>\Omega</math>erm</i>                                                 | This study        | SCB2582      | pNAR778  |
| NAB1202  | $\Delta$ <i>ssrA::cat</i> , <i>thrC::P<sub>xylA</sub> GFP-ns<math>\Omega</math>erm</i>                                              | This study        | SCB2582      | pNAR780  |
| NAB1280  | $\Delta$ <i>smpB::erm</i>                                                                                                           | This study        | PY79         | BKE33600 |
| NAB1281  | $\Delta$ <i>yesZ::loxP</i> , $\Delta$ <i>lacA::loxP</i> , $\Delta$ <i>smpB::erm</i>                                                 | This study        | KFB793       | NAB1233  |
| NAB1282  | $\Delta$ <i>smpB::loxP</i>                                                                                                          | This study        | NAB1280      | pMK2     |
| NAB1283  | $\Delta$ <i>yesZ::loxP</i> , $\Delta$ <i>lacA::loxP</i> , $\Delta$ <i>smpB::loxP</i>                                                | This study        | NAB1281      | pMK2     |
| NAB1286  | $\Delta$ <i>yesZ::loxP</i> , $\Delta$ <i>lacA::loxP</i> , $\Delta$ <i>smpB::loxP</i> / pNAR813                                      | This study        | NAB1283      | pNAR813  |
| NAB1298  | $\Delta$ <i>brfA::erm</i>                                                                                                           | This study        | PY79         | BKE23540 |
| NAB1346  | $\Delta$ <i>brfA::kan</i>                                                                                                           | This study        | PY79         | pNAR903  |
| NAB1509  | <i>amyE::P<sub>mifM</sub> rbsm1-GFP-brfA-FLAG<math>\Omega</math>lacZ<math>\Omega</math>cat</i>                                      | This study        | PY79         | pNAR1036 |
| NAB1510  | <i>amyE::P<sub>mifM</sub> rbsm1-GFP-brfA62-FLAG<math>\Omega</math>lacZ<math>\Omega</math>cat</i>                                    | This study        | PY79         | pNAR1037 |
| NAB1511  | <i>amyE::P<sub>mifM</sub> rbsm1-GFP-brfA(no_term)-FLAG<math>\Omega</math>lacZ<math>\Omega</math>cat</i>                             | This study        | PY79         | pNAR1038 |
| NAB1514  | $\Delta$ <i>smpB::erm</i> , <i>rbsm1-GFP-brfA-FLAG<math>\Omega</math>lacZ<math>\Omega</math>cat</i> <i>amyE::P<sub>mifM</sub></i>   | This study        | NAB1280      | pNAR1036 |
| NAB1515  | $\Delta$ <i>smpB::erm</i> , <i>amyE::P<sub>mifM</sub> rbsm1-GFP-brfA62-FLAG<math>\Omega</math>lacZ<math>\Omega</math>cat</i>        | This study        | NAB1280      | pNAR1037 |
| NAB1516  | $\Delta$ <i>smpB::erm</i> , <i>amyE::P<sub>mifM</sub> rbsm1-GFP-brfA(no_term)-FLAG<math>\Omega</math>lacZ<math>\Omega</math>cat</i> | This study        | NAB1280      | pNAR1038 |
| SCB851   | <i>amyE::P<sub>mifM</sub> rbsm1-GFP-mifM35-flag-yidC2'-lacZ<math>\Omega</math>cat</i>                                               | ref. <sup>4</sup> |              |          |
| SCB2582  | $\Delta$ <i>ssrA::cat</i>                                                                                                           | This study        | PY79         | D1       |
| SCB4122  | <i>amyE::P<sub>mifM</sub> rbsm1 GFP-brfA62-FLAG<math>\Omega</math>cat</i>                                                           | This study        | PY79         | pCH2240  |
| SCB4126  | $\Delta$ <i>smpB::erm</i> , <i>amyE::P<sub>mifM</sub> rbsm1 GFP-brfA62-FLAG<math>\Omega</math>cat</i>                               | This study        | NAB1280      | pCH2240  |
| SCB4141  | <i>amyE::P<sub>mifM</sub> rbsm1-GFP-brfA-FLAG<math>\Omega</math>cat</i>                                                             | This study        | PY79         | pCH2239  |
| SCB4142  | <i>amyE::P<sub>mifM</sub> rbsm1-GFP-brfA(no_term)-FLAG<math>\Omega</math>cat</i>                                                    | This study        | PY79         | pCH2241  |
| SCB4144  | $\Delta$ <i>smpB::erm</i> , <i>amyE::P<sub>mifM</sub> rbsm1-GFP-brfA-FLAG<math>\Omega</math>cat</i>                                 | This study        | NAB1280      | pCH2239  |

|         |                                                                                                                  |                               |            |         |              |
|---------|------------------------------------------------------------------------------------------------------------------|-------------------------------|------------|---------|--------------|
| SCB4145 | <i>ΔsmpB::erm, rbsm1-GFP-brfA(no term)-FLAGΩcat</i>                                                              | <i>amyE::P<sub>mifM</sub></i> | This study | NAB1280 | pCH2241      |
| SCB4153 | <i>lacA::P<sub>xyIA</sub> dCas9Ωerm, amyE::P<sub>veg</sub> sgRNA-smpBΩcat</i>                                    |                               | This study | KFB946  | pCH2264      |
| SCB4191 | <i>lacA::P<sub>xyIA</sub> dCas9Ωerm, ΔbrfA::kanR</i>                                                             |                               | This study | KFB946  | NAB1346      |
| SCB4194 | <i>amyE::P<sub>veg</sub> sgRNA-smpBΩcat, lacA::P<sub>xyIA</sub> dCas9Ωerm, ΔbrfA::kanR</i>                       |                               | This study | SCB4191 | pCH2264      |
| SCB4199 | <i>amyE::P<sub>veg</sub> sgRNA-ssrAΩcat, lacA::P<sub>xyIA</sub> dCas9Ωerm, ΔbrfA::kanR</i>                       |                               | This study | SCB4191 | pCH2302      |
| SCB4205 | <i>lacA::P<sub>xyIA</sub> dCas9Ωerm, amyE::P<sub>veg</sub> sgRNA-ssrAΩcat</i>                                    |                               | This study | KFB946  | pCH2302      |
| SCB4215 | <i>amyE::P<sub>veg</sub> sgRNA-smpBΩcat, lacA::P<sub>xyIA</sub> dCas9Ωerm, ΔbrfA::kanR, thrC::PbrfA brfAΩspc</i> |                               | This study | SCB4194 | pCH2293      |
| SCB4217 | <i>amyE::P<sub>veg</sub> sgRNA-ssrAΩcat, lacA::P<sub>xyIA</sub> dCas9Ωerm, ΔbrfA::kanR, thrC::PbrfA brfAΩspc</i> |                               | This study | SCB4199 | pCH2293      |
| SCB4218 | <i>amyE::P<sub>mifM</sub> rbsm1-GFP-mifM35-flag-yidC2'-lacZΩcat, ssrA::cat::tet</i>                              |                               | This study | SCB851  | TSB2         |
| KFB792  | <i>ΔlacA::loxP-kanR</i>                                                                                          |                               | This study | PY79    | DNA fragment |
| KFB793  | <i>ΔyesZ::loxP, ΔlacA::loxP</i>                                                                                  |                               | This study | KYB112  | KFB792, pMK2 |
| KFB946  | <i>lacA::P<sub>xyIA</sub> dCas9Ωerm</i>                                                                          |                               | This study | PY79    | pJMP1        |
| KFB948  | <i>ΔyesZ::loxP, lacA::Pxyl-dCas9Ωerm</i>                                                                         |                               | This study | KYB112  | pJMP1        |
| KYB112  | <i>ΔyesZ::loxP</i>                                                                                               |                               | This study | PY79    | pKY13, pMK2  |

#### Supplementary Table 4. Plasmids

| Name    | Description                                      | Source            |
|---------|--------------------------------------------------|-------------------|
| pCm::Tc | <i>Cm::Tc</i>                                    | ref. <sup>5</sup> |
| pDG1664 | <i>thrC::erm</i> integration vector              | ref. <sup>6</sup> |
| pET28b  | vector                                           | Novagen           |
| pLOSS*  | Ts vector                                        | ref. <sup>7</sup> |
| pyqjG21 | <i>amyE::P<sub>mifM</sub> mifM-yidC2-gfp</i>     | ref. <sup>4</sup> |
| pJMP1   | <i>lacA::Pxyl dCas9Ωerm</i>                      | ref. <sup>8</sup> |
| pNAR756 | <i>P<sub>xyIA</sub> yidC2</i>                    | This study        |
| pNAR758 | <i>P<sub>xyIA</sub> yidC2-non_stop</i>           | This study        |
| pNAR778 | <i>thrC::P<sub>xyIA</sub> GFPΩerm</i>            | This study        |
| pNAR780 | <i>thrC::P<sub>xyIA</sub> GFP-nsΩerm</i>         | This study        |
| pNAR809 | <i>P<sub>spac</sub> smpB</i>                     | This study        |
| pNAR813 | <i>P<sub>spac</sub> smpB-FLAG</i>                | This study        |
| pNAR869 | <i>brfA-his<sub>6</sub></i>                      | This study        |
| pNAR879 | <i>amyE::P<sub>mifM</sub> rbsm1-GFP-brfAΩcat</i> | This study        |
| pNAR901 | upstream region of <i>brfA</i>                   | This study        |
| pNAR903 | <i>ΔbrfA::kan</i>                                | This study        |
| pNAR913 | <i>Bs_prfA-his<sub>6</sub></i>                   | This study        |
| pNAR915 | <i>Bs_prfB-his<sub>6</sub></i>                   | This study        |

|          |                                                                                                         |                    |
|----------|---------------------------------------------------------------------------------------------------------|--------------------|
| pNAR916  | <i>brfA62-his<sub>6</sub></i>                                                                           | This study         |
| pNAR917  | <i>his<sub>6</sub>-arfA(2-60)</i>                                                                       | This study         |
| pNAR939  | <i>Bs_pfrB(SPT)</i>                                                                                     | This study         |
| pNAR1036 | <i>amyE::P<sub>mifM</sub> rbsm1-GFP-brfA-FLAG<math>\Omega</math>lacZ<math>\Omega</math>cat</i>          | This study         |
| pNAR1037 | <i>amyE::P<sub>mifM</sub> rbsm1-GFP-brfA62-FLAG<math>\Omega</math>lacZ<math>\Omega</math>cat</i>        | This study         |
| pNAR1038 | <i>amyE::P<sub>mifM</sub> rbsm1-GFP-brfA(no_term)-FLAG<math>\Omega</math>lacZ<math>\Omega</math>cat</i> | This study         |
| pCH735   | <i>amyE::P<sub>mifM</sub> mifM-lacZ<math>\Omega</math>cat</i>                                           | ref. <sup>4</sup>  |
| pCH747   | <i>amyE::P<sub>mifM</sub> mifM-gfp<math>\Omega</math>cat</i>                                            | This study         |
| pCH805   | <i>amyE::P<sub>mifM</sub> GFP-mifM35-yidC2'-lacZ<math>\Omega</math>cat</i>                              | ref. <sup>4</sup>  |
| pCH913   | <i>amyE::P<sub>mifM</sub> rbsm1-GFP-mifM35-yidC2'-lacZ<math>\Omega</math>cat</i>                        | ref. <sup>4</sup>  |
| pCH1141  | <i>thrC::P<sub>xyIA</sub><math>\Omega</math>erm</i>                                                     | ref. <sup>9</sup>  |
| pCH1142  | <i>kan<math>\Omega</math>spc</i>                                                                        | ref. <sup>10</sup> |
| pCH1517  | <i>amyE::PyqzJ rbsm1-GFP-mifM35-95-lacZ<math>\Omega</math>cat</i>                                       | ref. <sup>10</sup> |
| pCH2238  | <i>his<sub>6</sub>-Bs_pfrB</i>                                                                          | This study         |
| pCH2239  | <i>amyE::P<sub>mifM</sub> rbsm1 GFP-brfA-FLAG<math>\Omega</math>cat</i>                                 | This study         |
| pCH2240  | <i>amyE::P<sub>mifM</sub> rbsm1 GFP-brfA62-FLAG<math>\Omega</math>cat</i>                               | This study         |
| pCH2241  | <i>amyE::P<sub>mifM</sub> rbsm1 GFP-brfA(no_term)-FLAG<math>\Omega</math>cat</i>                        | This study         |
| pCH2264  | <i>amyE::P<sub>veg</sub> sgRNA-smpB<math>\Omega</math>cat</i>                                           | This study         |
| pCH2293  | <i>thrC::P<sub>brfA</sub> brfA<math>\Omega</math>spc</i>                                                | This study         |
| pCH2302  | <i>amyE::P<sub>veg</sub> sgRNA-ssrA<math>\Omega</math>cat</i>                                           | This study         |
| pCH2307  | <i>Bs_pfrB(GAQ)-his<sub>6</sub></i>                                                                     | This study         |
| pKIG855  | <i>amyE::P<sub>veg</sub> sgRNA-rfp<math>\Omega</math>cat</i>                                            | This study         |
| pMK2     | <i>Pspac cre</i>                                                                                        | This study         |
| pKY13    | <i>AyesZ::loxP-kan-loxP</i>                                                                             | This study         |
| pNR1     | <i>amyE::P<sub>xyIA</sub> rbsm1 mifM-GFP<math>\Omega</math>cat</i>                                      | This study         |

## Supplementary Table 5. Primers

| Name | Sequence                                     |
|------|----------------------------------------------|
| SP1  | TATTTTAAAGGGGAAATCACATAAAAAGGAGGAGAACAAAA    |
| SP2  | GAAGCTTATCGAATTCAGTTCAGCCATGATAAACAAGACTG    |
| SP3  | AGTCTTGTTTATCATGGCTGAACTAGTGAATTCGATAAGCTTC  |
| SP4  | TTTTGTTCTCCTCCTTTTTATGTGATTTCCCCTTAAAAATA    |
| SP5  | GTGAAAAATAAAAGCAACCCCGTGCAAAAAG              |
| SP6  | GGGGTTGCTTTTATTTTTCACCGACTCAGTAAGAGC         |
| SP7  | GAACAAAATTGTTAAAAACATATGGATCCAAGCTTACTAGTAGT |
| SP8  | GAAGCTTATCGAATTCAGTTCACGGCCGTTTGTATAGTTCATC  |

SP9 GATGAACTATACAAACGGCCGTGAACTAGTGAATTCGATAAGCTTC  
 SP10 ACTACTAGTAAGCTTGGATCCATATGTTTTTAACAATTTTGTTT  
 SP11 CTTTTTGCACGGGGTTGCTTTTATTCGGCCGTTTGTATAGTTCATC  
 SP12 GATGAACTATACAAACGGCCGAATAAAAGCAACCCCGTGCAAAAAG  
 SP13 AGGCCGCGGATGCATAGGCCTTTAGAGAGAGGAGGTTCTGGC  
 SP14 TGGGGATCCGCATGCACTAGTTTAGAAGCCTTTTTGACTGTC  
 SP15 GACAGTCAAAAAGGCTTCTAAACTAGTGCATGCGGATCCCCA  
 SP16 GCCAGAACCTCTCTCTCTAAAGGCCTATGCATCCGCGGCCT  
 SP17 CTACAAAGACGATGACGACAAGTAAACTAGTGCATGCGGATCCC  
 SP18 GTCGTCATCGTCTTTGTAGTCGAAGCCTTTTTGACTGTCTCT  
 SP19 CTTTAAGAAGGAGATATACCATGGCAAAAAGCCAAGCGAAAAAG  
 SP20 CTCAGTGGTGGTGGTGGTGGTGGGGCGGCTTTTTGGGGCACAaaaaaaATC  
 SP21 GATTTTTTTTGTGCCCAAAAAGCCGCCACCACCACCACCACTGAG  
 SP22 CTTTTTCGCTTGGCTTTTTGCCATGGTATATCTCCTTCTTAAAG  
 SP23 CCGCGGGGTGCAACAGGATCCGCAAAAAGCCAAGCGAAAAAG  
 SP24 CTGGTCTGATCGGATCTCTAGGCCGCTTTTTGGGGCACAaaaaaaATC  
 SP25 GATTTTTTTTGTGCCCAAAAAGCCGCCTAGAGATCCGATCAGACCAG  
 SP26 CTTTTTCGCTTGGCTTTTTGCGGATCCTGTTGCACCCCGCGG  
 SP27 GATTATACCGAGGTATGAAAACCTTGGTCTGATAATGGGATTTAC  
 SP28 TCTGTAAAGGTCCAATTCTCGGTGATCACTCCCTTTTTTATTTTC  
 SP29 CGAGAATTGGACCTTTACAGA  
 SP30 TTTTCATACCTCGGTATAATC  
 SP31 TTAAGTGGATGAATTGTTTTAGCATTCATCTCTATTGTTTCTT  
 SP32 TTAGACATCTAAATCTAGGTAGTTTATACATAGAAACAGCA  
 SP33 TACCTAGATTTAGATGTCTAAAAAGC  
 SP34 CTAAAACAATTCATCCAGTAA  
 SP35 TAACTTTAAGAAGGAGATATAACCAATGTTAGACCGTTTAAAAATCAA  
 SP36 TTATTAGTGGTGGTGGTGGTGGTGGTGACCTCCGACTGCTGAAGCTTG  
 SP37 CACCACCACCACCACCCTAATAATGAGATCCGGCTGCTAACAAAAG  
 SP38 TGGTATATCTCCTTCTTAAAGTTA  
 SP39 TAACTTTAAGAAGGAGATATAACCAATGGAATTATCAGAAATTAGAGC  
 SP40 TTATTAGTGGTGGTGGTGGTGGTGGTGAAAGCTTAGAACGCAGGTAG  
 SP41 CATAACAGCAGTTGATGATAAGCACCACCACCACCACTGAG  
 SP42 CATGAATGGTCTTCGGTTTCCG  
 SP43 CGGAAACCGAAGACCATTCATG  
 SP44 CTCAGTGGTGGTGGTGGTGGTGCTTATCATCAACTGCTGTATG

SP45 GGCCTGGTGCCGCGCGGCAGCAGTCGATATCAGCATACTAAA  
 SP46 GGCTTTGTTAGCAGCCGGATCTTAGTGATTTACTTTCTTGCCACT  
 SP47 GATCCGGCTGCTAACAAAGCC  
 SP48 GCTGCCGCGCGGCACCAGGCC  
 SP49 GTGCGGATCTCACCAACAGATTCATCAGGCCGCCGC  
 SP50 GCGGCGGCCTGATGAATCTGTTGGTGAGATCCGCACAAG  
 SP51 GGCCTGGTGCCGCGCGGCAGCGAATTATCAGAAATTAGAGCAG  
 SP52 AGGTCAAGAGACCCCCTAAAGTCCGC  
 SP53 AGGGGGTCTCTTGACCTCGAATCAAAGGA  
 SP54 GGCTTTGTTAGCAGCCGGATCTTATGAAAGCTTAGAACGCAG  
 SP55 TATAAAGACGACGACGACAAAATAGAGATCCGATCAGACCAGT  
 SP56 GTCGTCGTCGTCTTTATAGTCGGCGGCTTTTTGGGGCACAAAAAATC  
 SP57 GTCGTCGTCGTCTTTATAGTCCTTATCATCAACTGCTGTATG  
 SP58 ACCATACAGCAGTAGACGACAAAGACTTCTTCGTGCCCCAAAAAG  
 SP59 TCGTCTACTGCTGTATGGTCGTACGGGTTCTTATGCTCCGTTTAT  
 SP60 GCTCGTGTTGTACAATAAATGTAGGAATCCTTAAGGTTTACGGTTTTAGAGCTAGAAATAGC  
 AAGTTAAAATAAGGC  
 SP61 ACATTTATTGTACAACACGAGCC  
 SP62 TTCGATAAGCTTCTAGGATCCCATGCAGCTTACAGCAGTG  
 SP63 GGCCAAAAAACTGCTGCCTTCTTAGGCGGCTTTTTGGGGCAC  
 SP64 GAAGGCAGCAGTTTTTTGGCCTTC  
 SP65 GGATCCTAGAAGCTTATCGAA  
 SP66 GCTCGTGTTGTACAATAAATGTGTGTTTACGAGATCGCCTCTGTTTTAGAGCTAGAAATAGC  
 AAGTTAAAATAAGGC  
 SP67 GCGCGGGCGCACAGCACGTCAATACGACG  
 SP68 GCCCGCGCCGCTTGCACGGTA  
 SP69 GATCCTAGAAGCTTATCGAATTCC  
 SP70 GCAGTCTAGACTCGAGTAAGG  
 SP71 CCTTACTCGAGTCTAGACTGCTCGAATTCTCATGTTTGACAG  
 SP72 GGAATTCGATAAGCTTCTAGGATCCGATCA  
 SP73 TTAACATAATAAGGAGGACAAACATGTCCAATTTACTGACCGT  
 SP74 CCGGTTATTACTAATCGCCATCTTCCA  
 SP75 CGATTAGTAATAATAACCGGGCAGGCCATG  
 SP76 TTGTCCTCCTTATTAGTTAATCAATTCAAGCTTAATTGTTAT  
 SP77 AAGCTTGGCGTAATCATGGTC  
 SP78 GAGCTCGAATTCCTGCAGCTG  
 SP79 GGTACCCGGGGATCCACTAGT  
 SP80 GCATGCCTCGAGGGGCCGCC

SP81 CAGCTGCAGGAATTCGAGCTCATCTCACCCGCCACTGCTTTT  
 SP82 ACTAGTGGATCCCCGGGTACCCACATTTTCACCTTTCTTTGA  
 SP83 GGGCGGCCCTCGAGGCATGCTTCTTTGTATCGAATCAGCTT  
 SP84 GACCATGATTACGCCAAGCTTTTTTCCGGTCCGTTTTGACAG  
 SP85 GTGAATTCGATAAGCTTCTAGAAGCTAGGAGGAGGATGTGATGACAATGTTTGT  
 SP86 CACACAAATTA AAAACTGGTCT  
 SP87 AGACCAGTTTTTAATTTGTGTG  
 SP88 TAGAAGCTTATCGAATTCAC  
 SP89 GGTACCCGGGGATCCACTAGT  
 SP90 GCATGCCTCGAGGGGCCGCC  
 SP91 CAGCTGCAGGAATTCGAGCTCTAAATTGACAATGCAGTCCAG  
 SP92 ACTAGTGGATCCCCGGGTACCATTCTCCTCCTTGTCTCTTA  
 SP93 GGGCGGCCCTCGAGGCATGCGCTGATGCTCCGCTCGATATG  
 SP94 GACCATGATTACGCCAAGCTTATTTCCATGCCATCGCCATC  
 SP95 TAACTTTAAGAAGGAGGGAGATATACCAATGACAATGTTTGTGGGATC  
 SP96 TTTGTATAGTTCATCCATGCC  
 SP97 TTATTATAAAAAGAAGAGAACC  
 SP98 GAAATTAATACGACTCACTATAGGGAGACCACAACGGTTTCCCTCTAGAAATAATTTTGTTT  
 AACTTTAAGAAGGAG  
 SP99 TAACTTTAAGAAGGAGGATTTTAGAATGACCATGATTACGGATTCA  
 SP100 AAAACTGGTCTGATCGGATCTTTATTTTGTACACCAGACCAACTG  
 SP101 AGATCCGATCAGACCAGTTTT  
 SP102 AAATCCTCCTTCTTAAAGTTACTATTTGTGTCGTCGTCGCTTT  
 nlpD CGGCGGTCTAATCAACATAC  
 rev

**Supplementary Table 6.**

| Plasmid name | Combinations of primers and template DNAs for plasmid construction |           |          |          |  |  |
|--------------|--------------------------------------------------------------------|-----------|----------|----------|--|--|
| pNAR756      | SP1, 2                                                             | /PY79 DNA | SP3, 4   | /pCH1141 |  |  |
| pNAR758      | SP5, 6                                                             | /pNAR756  |          |          |  |  |
| pNAR778      | SP7, 8                                                             | /pNR1     | SP9, 10  | /pNAR756 |  |  |
| pNAR780      | SP7, 11                                                            | /pNR1     | SP10, 12 | /pNAR758 |  |  |
| pNAR809      | SP13, 14                                                           | /PY79 DNA | SP15, 16 | /pLOSS*  |  |  |
| pNAR813      | SP17, 18                                                           | /pNAR809  |          |          |  |  |
| pNAR869      | SP19, 20                                                           | /PY79 DNA | SP21, 22 | /pET28b  |  |  |
| pNAR879      | SP23, 24                                                           | /PY79 DNA | SP25, 26 | /pCH913  |  |  |
| pNAR901      | SP27, 28                                                           | /PY79 DNA | SP29, 30 | /pCH1142 |  |  |



|          |           |                |            |           |          |                    |
|----------|-----------|----------------|------------|-----------|----------|--------------------|
| pNAR903  | SP31, 32  | /PY79 DNA      | SP33, 34   | /pNAR901  |          |                    |
| pNAR913  | SP35, 36  | /PY79 DNA      | SP37, 38   | /pET28b   |          |                    |
| pNAR915  | SP39, 40  | /pCH2238       | SP37, 38   | /pET28b   |          |                    |
| pNAR916  | SP41, 42  | /pNAR869       | SP43, 44   | /pNAR869  |          |                    |
| pNAR917  | SP45, 46  | /JM109 DNA     | SP42, 47   | /pET28b   | SP43, 48 | /pET28b            |
| pNAR939  | SP49, 50  | /pNAR915       |            |           |          |                    |
| pNAR1036 | SP99, 100 | /pCH1517       | SP101, 102 | /pCH2239  |          |                    |
| pNAR1037 | SP99, 100 | /pCH1517       | SP101, 102 | /pCH2240  |          |                    |
| pNAR1038 | SP99, 100 | /pCH1517       | SP101, 102 | pCH2241   |          |                    |
| pCH2238  | SP51, 52  | /PY79 DNA      | SP53, 54   | /PY79 DNA | SP47, 48 | /pET28b            |
| pCH2239  | SP55, 56  | /pNAR879       |            |           |          |                    |
| pCH2240  | SP55, 57  | /pNAR879       |            |           |          |                    |
| pCH2241  | SP58, 59  | /pCH2239       |            |           |          |                    |
| pCH2264  | SP60, 61  | /pKIG855       |            |           |          |                    |
| pCH2293  | SP62, 63  | /PY79 DNA      | SP64, 65   | /pDG1731  |          |                    |
| pCH2302  | SP61, 66  | /pKIG855       |            |           |          |                    |
| pCH2307  | SP67, 68  | /pNAR915       |            |           |          |                    |
| pKIG855  | SP69, 70  | /synthetic DNA | SP71, 72   | /pDG1662  |          |                    |
| pMK2     | SP73, 74  | /P1 phage DNA  | SP75, 76   | /pLOSS*   |          |                    |
| pKY13    | SP77, 78  | /pCH1142       | SP79, 80   | /pCH1142  | SP81, 82 | /PY79 DNA          |
| pNR1     | SP85, 86  | /pCH747        | SP87, 88   | /pCH1130  |          | SP86, 87 /PY79 DNA |

**Supplementary Table 7. PCR templates and primers for preparation of in vitro translation templates**

| Gene name        | 1st PCR |      |          | 2nd PCR |      |                 |
|------------------|---------|------|----------|---------|------|-----------------|
|                  | Primers |      | template | Primers |      | template        |
| GFP-ns           | SP95    | SP96 | pCH805   | SP98    | SP96 | 1st PCR product |
| GFP- <i>mifM</i> | SP95    | SP97 | pCH805   | SP98    | SP97 | 1st PCR product |

## Supplementary Figures

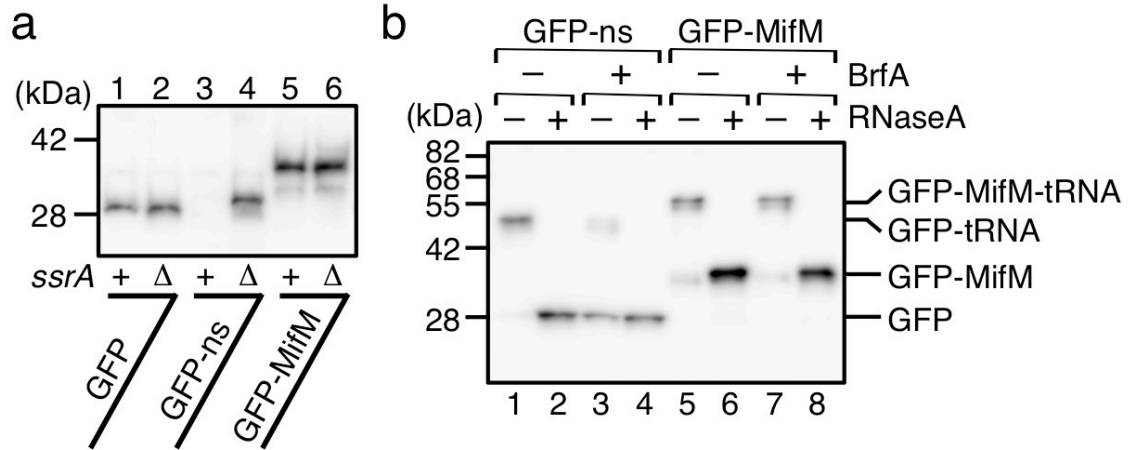

**Supplementary Fig. 1 | Nascent-chain mediated ribosome stalling is refractory to the ribosome rescue systems in *B. subtilis*.** **a**, MifM is refractory to *trans*-translation. Cellular accumulation of GFP-MifM was examined in the wild type and *ssrA*-deficient mutant strains. GFP (lanes 1, 2), GFP-ns (lanes 3, 4) and GFP-MifM (lanes 5, 6) were expressed in the wild type (odd number) and Δ*ssrA* (even number) strains of *B. subtilis*, separated by SDS-PAGE and detected with anti-GFP immunoblotting. **b**, Inability of BrfA to induce RF2 hydrolysis of the elongation-arrested MifM-tRNA. In vitro translation using *Bs* hybrid PURE system with RF2 was directed by the *gfp-ns* (lanes 1-4) or *gfp-mifM* (lanes 5-8) template in the presence (lanes 3, 4, 7, 8) or the absence (lanes 1, 2, 5, 6) of purified BrfA62-His. The translation products were analyzed by anti-GFP immunoblotting as described above.

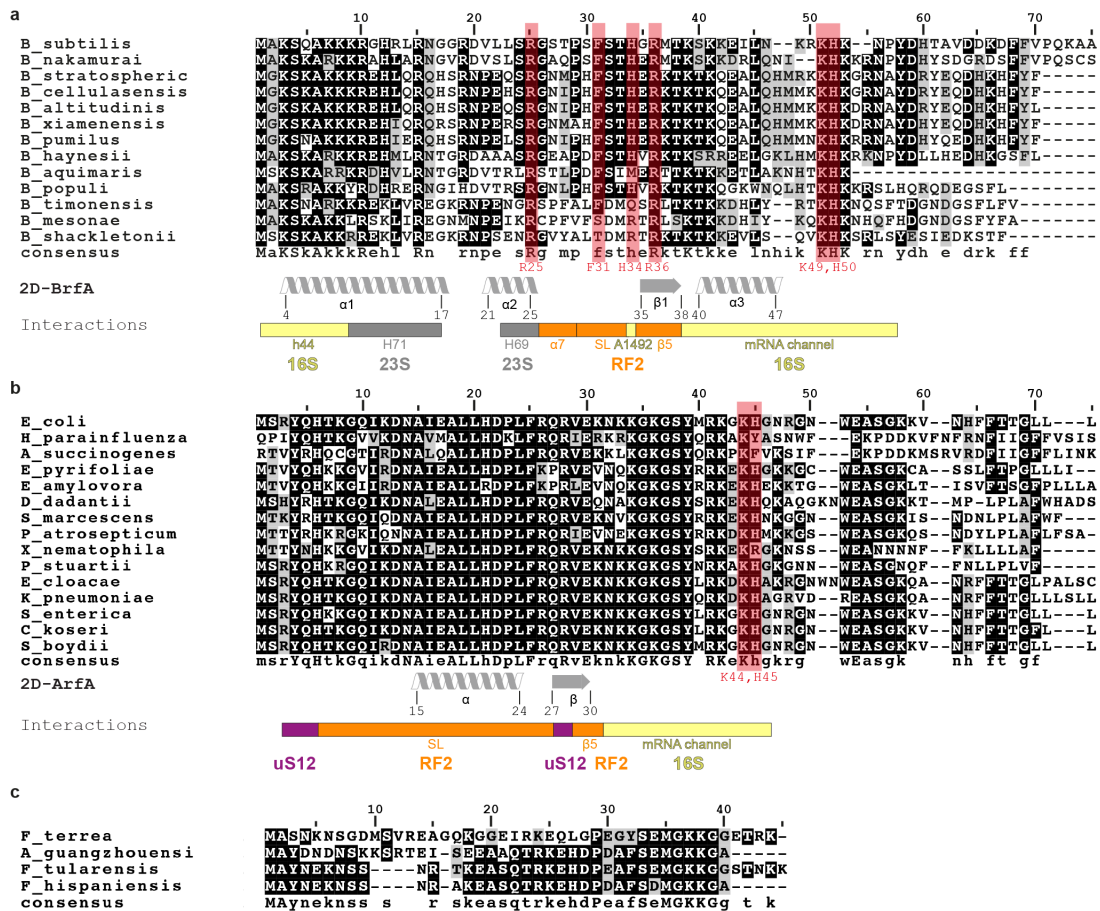

**Supplementary Fig. 2 | Multiple sequence alignments of BrfA, ArfA, and ArfT homologs.**

**a-c.** Multiple sequence alignments of (a) BrfA, (b) ArfA and (c) ArfT generated with Clustal W<sup>11</sup> and Boxshade with residues shaded that are identical (black) or similar (grey). Below each alignment, the consensus sequence with capital letters indicating 100% conservation and lower-case letters indicating less conservation). The known secondary structure is shown for *B. subtilis* BrfA (2D-BrfA) in (a) and *E. coli* ArfA (2D-ArfA) in (b), as well as interaction regions between (a) BrfA and (b) ArfA with the ribosome (16S rRNA, yellow, 23S rRNA, grey and uS12, violet) and RF2 (orange).

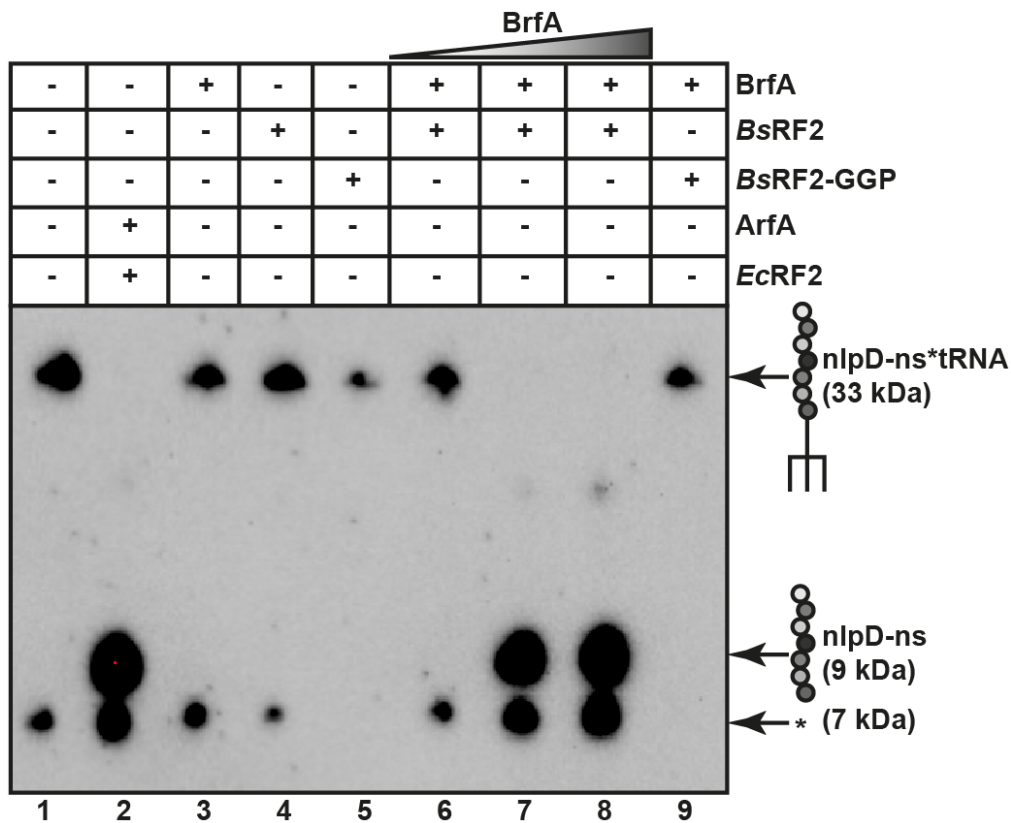

### Supplementary Fig. 3 | Recycling of non-stop ribosomes by BrfA and RF2.

*In vitro* translation assays using the *E. coli* PURE system $\Delta$ RF123 kit (lacking all RFs) were performed with truncated non-stop *nlpD* DNA template, in the presence of BrfA, wildtype *B. subtilis* RF2 (*BsRF2*) and the RF2-GGP mutant (*BsRF2*-GGP) alone (lanes 3-5), or *BsRF2* (20 pmol) with increasing concentrations (12-100 pmol) of BrfA (lanes 6-8), or BrfA (100 pmol) in the presence of 100 pmol *BsRF2*-GGP (lane 9). As a positive control, reactions were performed with *E. coli* ArfA and RF2 (*EcRF2*), as described previously (lane 2) <sup>12</sup>. A negative control was also performed where reactions lacked all RFs and rescue factors (lane 1). Western blotting of NuPAGE gels using an antibody against the HA-tag present in the N-terminus of the NlpD peptide detected the presence of the non-stop NlpD-peptidyl-tRNA (33 kDa) and released NlpD peptide (9 kDa). The asterisk (\*) indicates a mysterious band that cross-reacts with the HA-antibody, but is also present in the negative control and was therefore not examined further. As expected, the negative control (lane 1), as well as reactions performed in the presence of BrfA, *BsRF2* or *BsRF2*GGP alone (lanes 3-5), show a strong band for the NlpD-peptidyl-tRNA and no evidence for the released NlpD peptide. By contrast, the positive control with ArfA and *EcRF2* (lane 2), as well as the reactions with *BsRF2* and increasing concentrations of BrfA (lanes 7 and 8) shows no NlpD-peptidyl-tRNA and only the presence of released NlpD peptide. As expected, substitution of wildtype *BsRF2* with the inactive *BsRF2*-GGP mutant led to a loss the band for the released NlpD peptide and the presence of NlpD-peptidyl-tRNA was restored (lane 9). Source data are provided as a Source Data file.

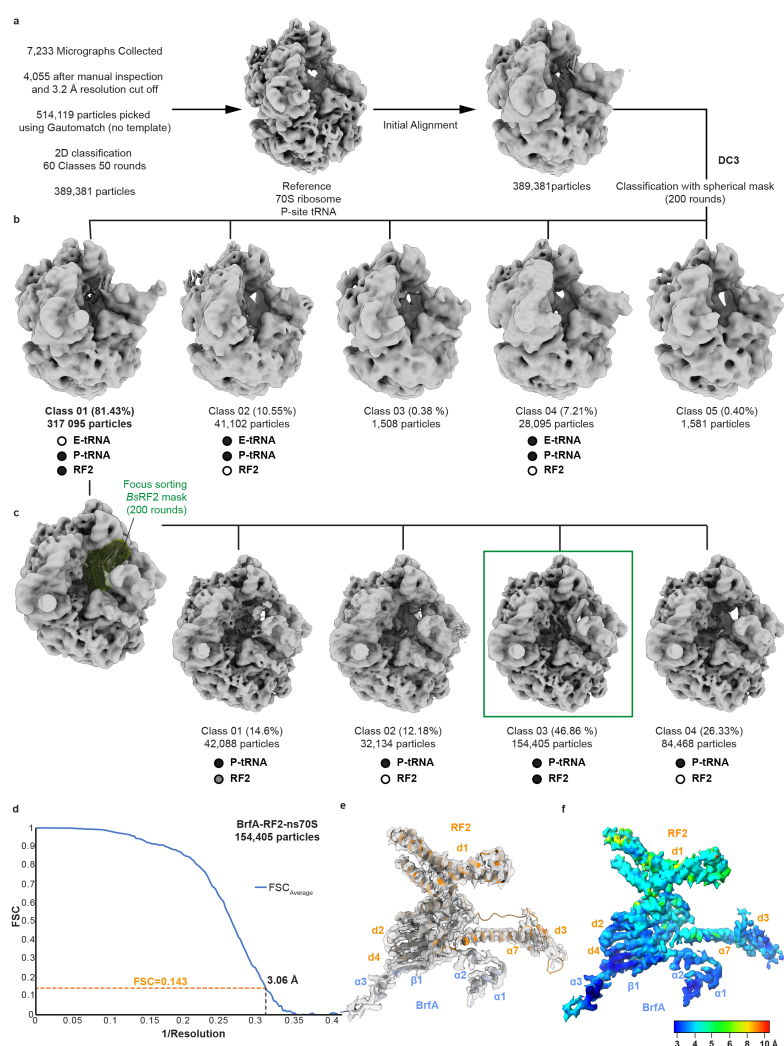

### Supplementary Fig. 4 | *In silico* sorting of the BrfA-RF2-ns70S complex.

**a**, After particle picking and extensive 2D classification, the complete dataset of 389,381 particles was initially aligned against a P-site tRNA containing *E. coli* 70S ribosome. **b**, Following 3D classification for 200 rounds in Relion, five classes were generated. The majority (317,095 particles; 81.43%) of particles were found in class 1 and contained the BrfA-RF2-ns70S complex. The second major (41,102 particles; 10.55%) class 2 contained a fully programmed ribosome, but without the presence of RF2. In addition, three minor classes 4-6 (class 3; 1,508 particles; 0.38 %, class 4; 28,095 particles; 7.21%; class 5; 1,581 particles; 0.4%) containing damaged and/or poorly aligning particles were observed. **c**, The 317,095 particles from the class 1 were further sorted using a focus sorting mask around RF2, resulting in four additional classes, of which class 3 (154,405 particles, 46.86%) contained stoichiometric occupancy of P-site tRNA, RF2 and BrfA. Class 3 was then refined to yield a (**d**) final reconstruction of the BrfA-RF2-ns70S complex with an average resolution of 3.15 Å (0.143 FSC). **e-f**, Isolated electron density for BrfA and RF2 **e**, shown as grey mesh with fitted model and (**f**) colored according to local resolution

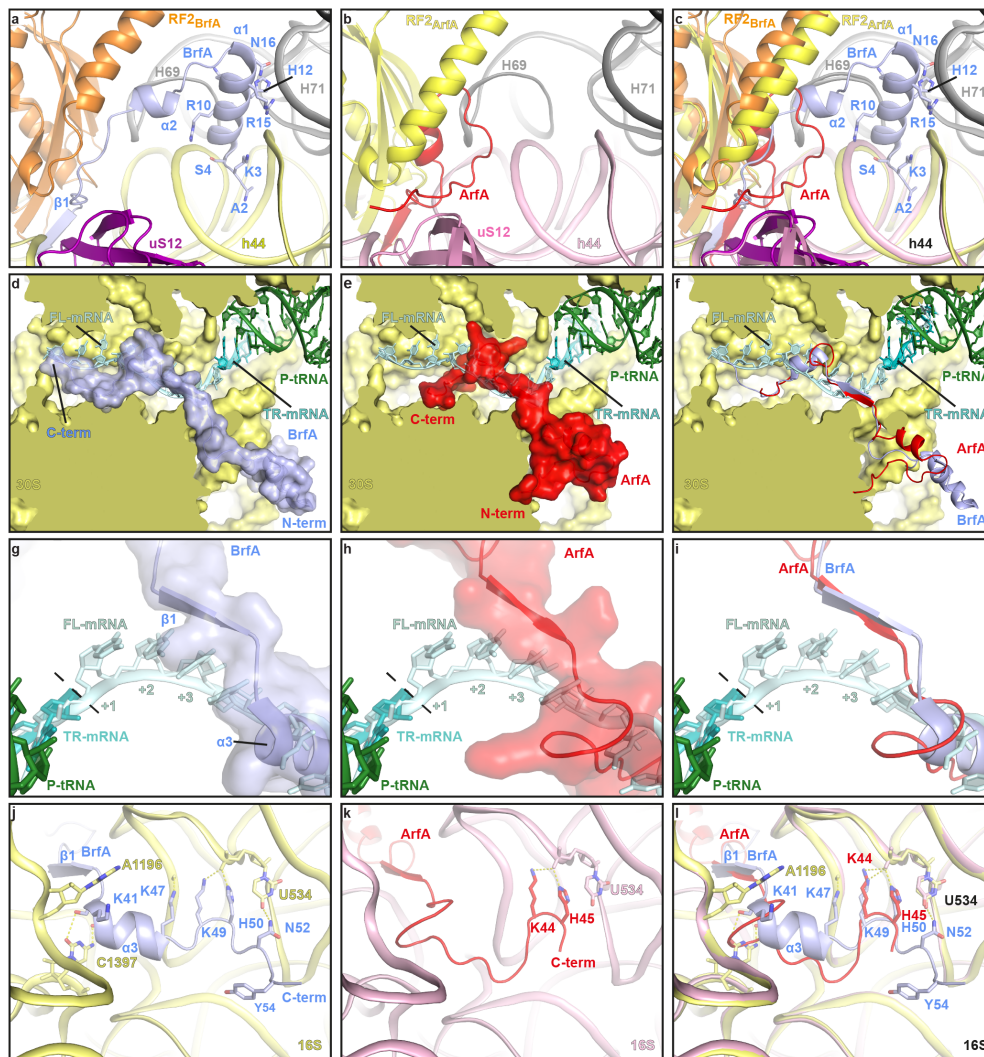

**Supplementary Fig. 5 | Interactions of BrfA and ArfA on the ribosome.** **a**, Interaction of the N-terminus of BrfA (blue) with RF2 (orange), uS12 (violet), helix 44 (h44) of the 16S rRNA (yellow) and helix 69 (H69) and H71 of the 23S rRNA (grey). **b**, Same view as **(a)**, but for the ArfA-RF2-70S complex, with ArfA (red), RF2 (yellow) and 16S rRNA (pink) <sup>12</sup>. **c**, Overlay of **(a)** and **(b)**. **d-e**, Transverse section of the 30S subunit (yellow) to reveal the mRNA channel showing a superimposition of full-length mRNA (FL-mRNA, cyan) with truncated non-stop mRNA (TR-mRNA, teal), P-site tRNA (green) and surface representations of **(d)** BrfA (blue) and **(e)** ArfA (red) <sup>12</sup>. **f**, Overlay of **(d)** and **(e)** with cartoon representations of BrfA (blue) and ArfA (red). **g-h**, Superimposition of full-length mRNA (FL-mRNA, cyan) with truncated non-stop mRNA (TR-mRNA, teal), P-site tRNA (green) and transparent surface representations of **(g)** BrfA (blue) and **(h)** ArfA (red) <sup>12</sup>. The first (+1), second (+2) and third (+3) nucleotides of the A-site codon of the FL-mRNA are indicated. **i**, Overlay of **(g)** and **(h)** with cartoon representations of BrfA (blue) and ArfA (red). **j-k**, Interaction of the C-terminus of **(j)** BrfA (blue) and **(k)** ArfA (red) <sup>12</sup> with the 16S rRNA with potential hydrogen bonds indicated with yellow dashed lines. **l**, Overlay of **(j)** and **(k)**.

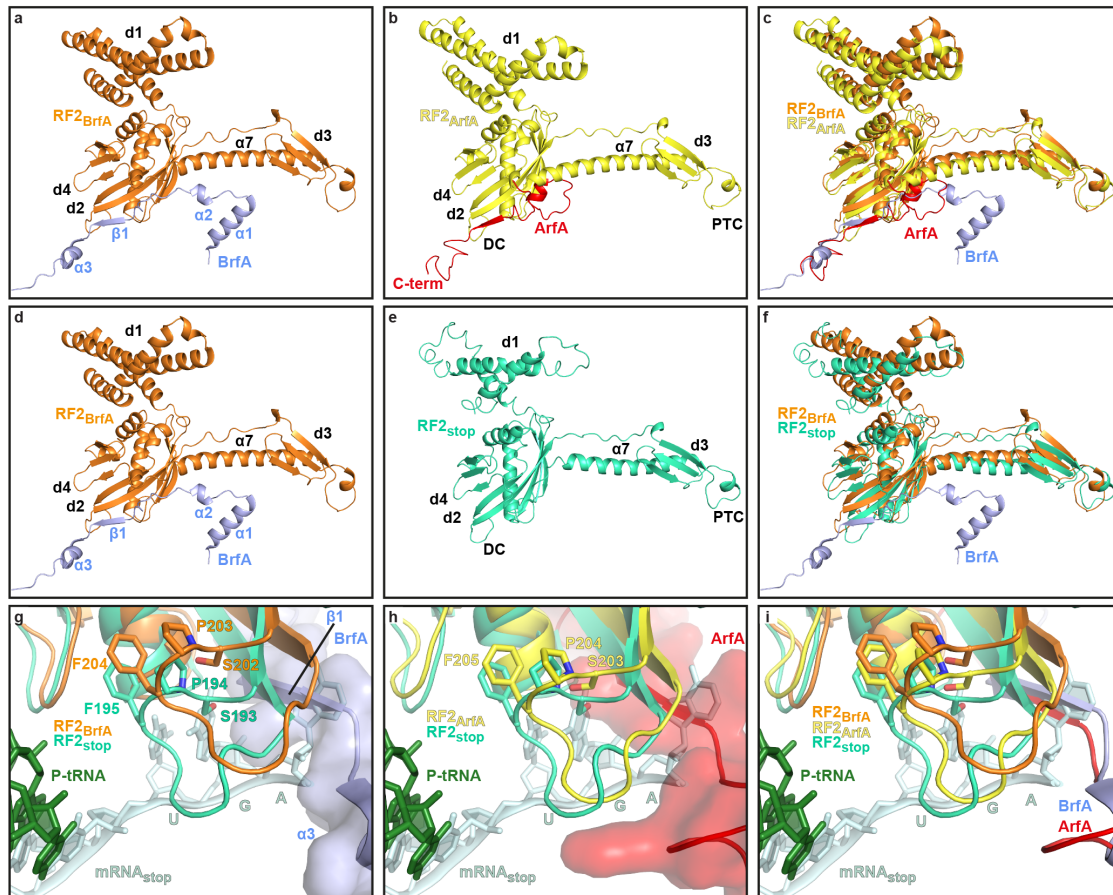

**Supplementary Fig. 6 | Interaction of BrfA and ArfA with RF2 on the ribosome.**

**a-b**, Interaction between (a) BrfA (blue) and RF2<sub>BrfA</sub> (orange) in the BrfA-RF2-ns70S complex compared with (b) ArfA (red) and RF2<sub>ArfA</sub> (yellow) in the ArfA-RF2-ribosome complex<sup>12</sup>. The approximate positions of the decoding center (DC) and peptidyltransferase center (PTC) on the ribosome are indicated. **c**, Superimposition of (a) and (b). **d-e**, The binding position of (d) RF2<sub>BrfA</sub> (orange) and BrfA (blue) in the BrfA-RF2-ns70S complex, compared with (e) RF2<sub>stop</sub> (lime) in a canonical termination complex<sup>13</sup>. The approximate positions of the decoding center (DC) and peptidyltransferase center (PTC) on the ribosome are indicated. **f**, Superimposition of (d) and (e). **g-h**, Superimposition of the SPF motif of RF2<sub>stop</sub> (lime) and UGA codon of the mRNA (cyan) (PDB ID 4V5E,<sup>13</sup>) with (g) the SPF motif of RF2<sub>BrfA</sub> (orange) and BrfA (blue), and (h) with the SPF motif of RF2<sub>ArfA</sub> (yellow) and ArfA (red)<sup>12</sup>. **i**, Overlay of (g) and (h) with BrfA (blue) and ArfA (red) as cartoon representations.

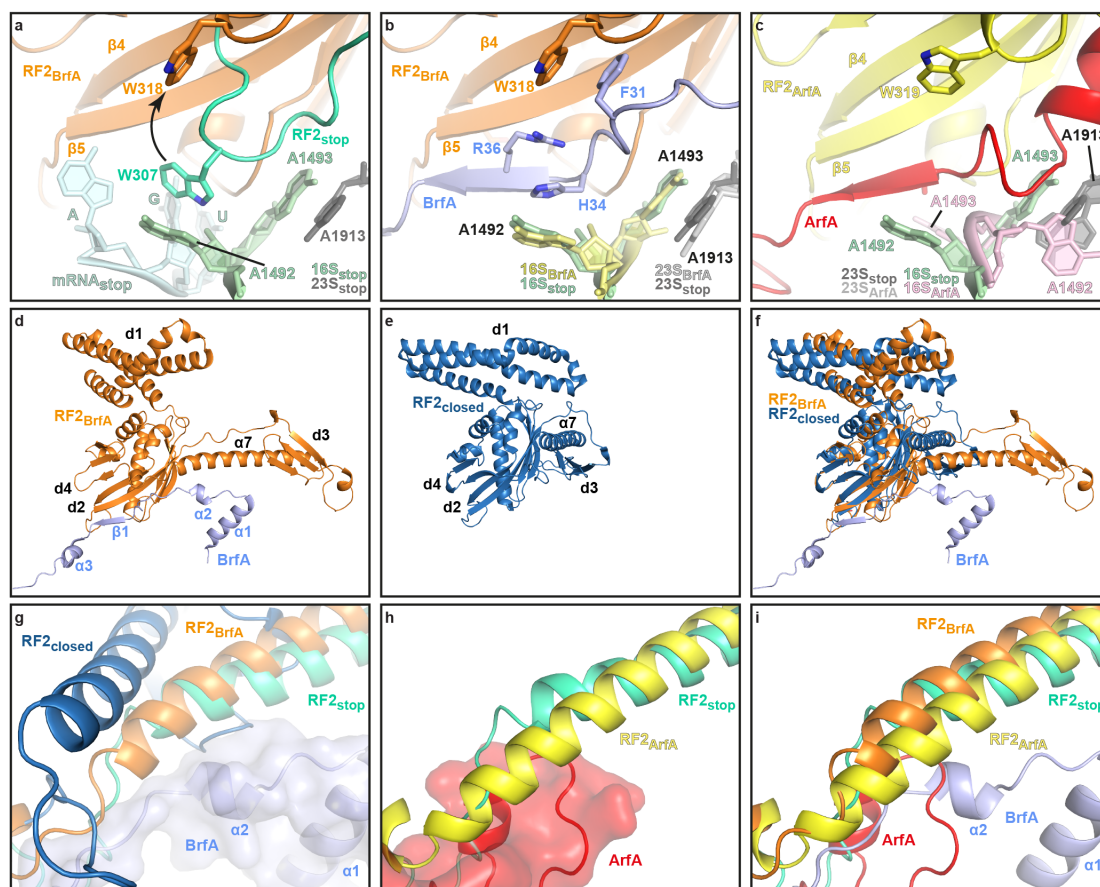

**Supplementary Fig. 7 | BrfA induces an open conformation of RF2 on the ribosome.**

**a**, Interaction between Trp307 (W307, which is equivalent to *B. subtilis* Trp318 (W318)) of the switch region of *Thermus thermophilus* RF2<sub>stop</sub> (lime) and A1492 of the 16S rRNA (green) during decoding of the UGA stop codon of the mRNA (cyan; PDB ID 4V5E<sup>13</sup>). W318 in the switch loop of RF2 (RF2<sub>BrfA</sub>, orange) observed upon BrfA binding is superimposed and arrowed. **b**, Same view as in **(a)**, showing the conformation of the switch loop of RF2<sub>BrfA</sub> (orange) and A1492/A1493 (pale yellow) when BrfA (blue) is present. **c**, Same view as in **(a)** and **(b)**, showing the conformation of A1492/A1493 in comparison to **(a)** and the switch loop in the presence of ArfA (red, PDB ID 5MVGP<sup>12</sup>). **(d)** Open conformation observed for RF2<sub>BrfA</sub> (orange) when in complex with BrfA on the ribosome, compared with **(e)** the closed conformation of RF2<sub>closed</sub> (dark blue, PDB ID 1GQE<sup>14</sup>) when not bound to the ribosome. **f**, Superimposition of **(d)** and **(e)**. **g**, Superimposition of the conformation of helix  $\alpha 7$  of RF2 from the crystal structure of the closed form of RF2<sub>closed</sub> with RF2<sub>stop</sub> (lime) and RF2<sub>BrfA</sub> (orange), with BrfA (blue) shown for reference. **h-i**, Same view as in **(g)** showing the conformation of helix  $\alpha 7$  of RF2<sub>stop</sub> superimposed with **(h)** RF2<sub>ArfA</sub>, and ArfA (red) and **(i)** including RF2<sub>BrfA</sub> (orange) and BrfA (blue).



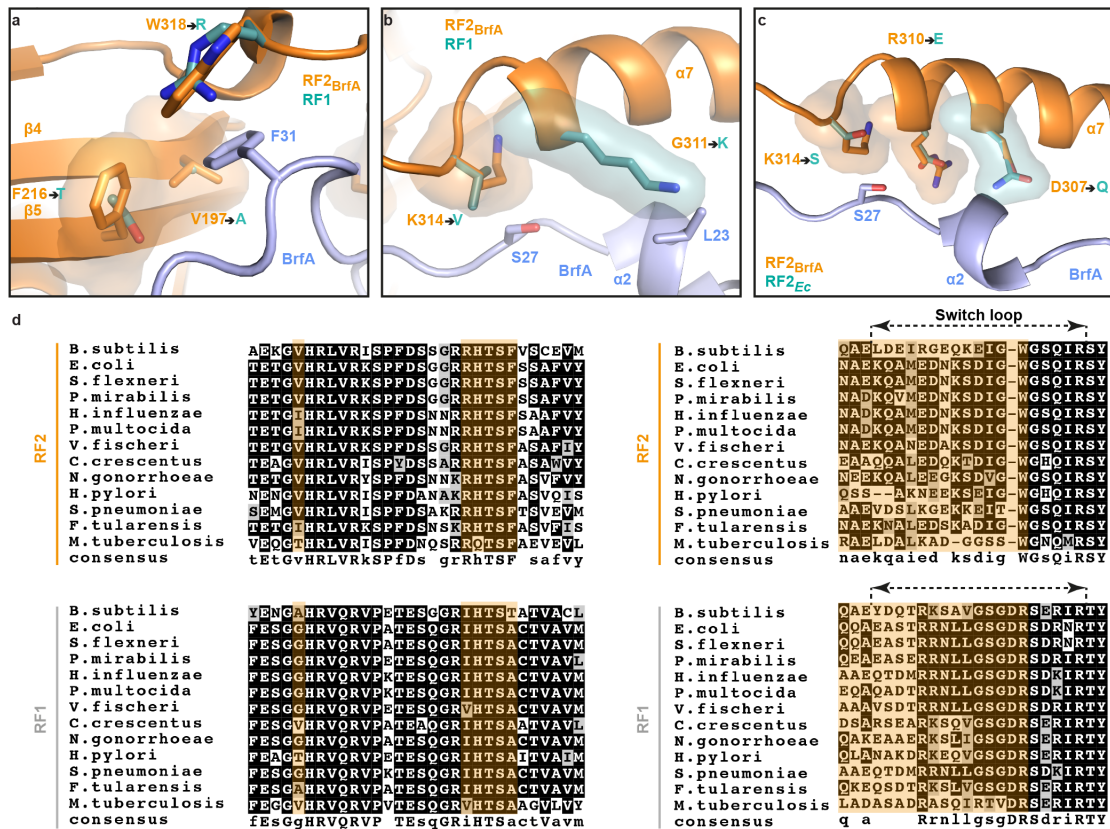

### Supplementary Fig. 8 | Basis for the species-specificity of BrfA

**a-b**, Potential species-specific interactions between BrfA (blue) and *B. subtilis* RF2 (orange) compared with a homology model for *B. subtilis* RF1 (green) aligned to the BrfA-RF2-ns70S. **a**, The BrfA interface with  $\beta 4$  and  $\beta 5$  strands of *B. subtilis* RF2 (orange) consists of hydrophobic residues Val197 and Phe216, which are substituted by Ala and Thr, respectively in *B. subtilis* RF1. **b**, The BrfA interface with the switch loop and helix  $\alpha 7$  of *B. subtilis* RF2 (orange) consists of multiple residues that are distinct *B. subtilis* RF2 and RF1, for example, G311, K314 and W318 (seen in (a)) of RF2 that are substituted with Lys, Val and Arg, respectively, in *B. subtilis* RF1. **c**, Potential sequence differences between *B. subtilis* RF2 (orange) and *E. coli* RF2 (green) that could come within close proximity of BrfA and could explain the species-specific activity of BrfA. **d**, Sequence alignments of RF1 and RF2 for the corresponding regions shown in (a)-(c).

## Supplementary References

- 1 Youngman, P., Perkins, J. B. & Losick, R. A novel method for the rapid cloning in *Escherichia coli* of *Bacillus subtilis* chromosomal DNA adjacent to Tn917 insertions. *Mol Gen Genet* **195**, 424-433, (1984).
- 2 Koo, B. M. *et al.* Construction and Analysis of Two Genome-Scale Deletion Libraries for *Bacillus subtilis*. *Cell Syst* **4**, 291-305 e297, (2017).
- 3 Muto, A. *et al.* Requirement of transfer-messenger RNA for the growth of *Bacillus subtilis* under stresses. *Genes Cells* **5**, 627-635, (2000).
- 4 Chiba, S., Lamsa, A. & Pogliano, K. A ribosome-nascent chain sensor of membrane protein biogenesis in *Bacillus subtilis*. *EMBO J* **28**, 3461-3475, (2009).
- 5 Steinmetz, M. & Richter, R. Plasmids designed to alter the antibiotic resistance expressed by insertion mutations in *Bacillus subtilis*, through in vivo recombination. *Gene* **142**, 79-83, (1994).
- 6 Guerout-Fleury, A. M., Frandsen, N. & Stragier, P. Plasmids for ectopic integration in *Bacillus subtilis*. *Gene* **180**, 57-61, (1996).
- 7 Claessen, D. *et al.* Control of the cell elongation-division cycle by shuttling of PBP1 protein in *Bacillus subtilis*. *Mol Microbiol* **68**, 1029-1046, (2008).
- 8 Peters, J. M. *et al.* A Comprehensive, CRISPR-based Functional Analysis of Essential Genes in Bacteria. *Cell* **165**, 1493-1506, (2016).
- 9 Saito, A. *et al.* Post-liberation cleavage of signal peptides is catalyzed by the site-2 protease (S2P) in bacteria. *Proc Natl Acad Sci U S A* **108**, 13740-13745, (2011).
- 10 Sohmen, D. *et al.* Structure of the *Bacillus subtilis* 70S ribosome reveals the basis for species-specific stalling. *Nat Commun* **6**, 6941, (2015).
- 11 Larkin, M. A. *et al.* Clustal W and Clustal X version 2.0. *Bioinformatics* **23**, 2947-2948, (2007).
- 12 Huter, P. *et al.* Structural basis for ArfA-RF2-mediated translation termination on mRNAs lacking stop codons. *Nature* **541**, 546-549, (2017).
- 13 Weixlbaumer, A. *et al.* Insights into translational termination from the structure of RF2 bound to the ribosome. *Science* **322**, 953-956, (2008).
- 14 Vestergaard, B. *et al.* Bacterial polypeptide release factor RF2 is structurally distinct from eukaryotic eRF1. *Mol Cell* **8**, 1375-1382, (2001).
